# Supplementary material
Source: publisher figshare collection journal article supplement (https://acs.figshare.com/ndownloader/files/14570123)

# checkCIF/PLATON report

Structure factors have been supplied for datablock(s) 3Cl-nondecomposition

THIS REPORT IS FOR GUIDANCE ONLY. IF USED AS PART OF A REVIEW PROCEDURE FOR PUBLICATION, IT SHOULD NOT REPLACE THE EXPERTISE OF AN EXPERIENCED CRYSTALLOGRAPHIC REFEREE.

No syntax errors found.      CIF dictionary      Interpreting this report

## Datablock: 3Cl-nondecomposition

---

|                 |                                                     |                                 |
|-----------------|-----------------------------------------------------|---------------------------------|
| Bond precision: | C-C = 0.0154 A                                      | Wavelength=0.68882              |
| Cell:           | a=7.72200                                           | b=12.87400      c=21.47700      |
|                 | alpha=84.2500                                       | beta=84.1800      gamma=83.7300 |
| Temperature:    | 293 K                                               |                                 |
|                 | Calculated                                          | Reported                        |
| Volume          | 2102.792                                            | 2103                            |
| Space group     | P -1                                                | P -1                            |
| Hall group      | -P 1                                                | -P 1                            |
| Moiety formula  | C42 H41.04 Cl2.96 N2 O6,<br>C42 H40.96 Cl3.04 N2 O6 | 2(C21 H20.48 Cl1.52 N O3)       |
| Sum formula     | C84 H82 Cl6 N4 O12                                  | C42 H41 Cl3 N2 O6               |
| Mr              | 1552.24                                             | 776.12                          |
| Dx,g cm-3       | 1.226                                               | 1.226                           |
| Z               | 1                                                   | 2                               |
| Mu (mm-1)       | 0.240                                               | 0.245                           |
| F000            | 812.0                                               | 812.0                           |
| F000'           | 813.14                                              |                                 |
| h,k,lmax        | 8,14,24                                             | 8,14,24                         |
| Nref            | 6673                                                | 6278                            |
| Tmin,Tmax       | 0.971,0.976                                         |                                 |
| Tmin'           | 0.964                                               |                                 |

Correction method= Not given

Data completeness= 0.941      Theta(max)= 23.320

R(reflections)= 0.1561( 4793)      wR2(reflections)= 0.4645( 6278)

S = 1.840      Npar= 489

---

The following ALERTS were generated. Each ALERT has the format

**test-name\_ALERT\_alert-type\_alert-level.**

Click on the hyperlinks for more details of the test.

---

### Alert level A

|                   |                                          |      |        |
|-------------------|------------------------------------------|------|--------|
| PLAT084_ALERT_3_A | High wR2 Value (i.e. > 0.25) .....       | 0.46 | Report |
| PLAT330_ALERT_2_A | Large Average Phenyl C-C Dist C14 -C22   | 1.44 | Ang.   |
| PLAT330_ALERT_2_A | Large Average Phenyl C-C Dist C2BA -C19A | 1.44 | Ang.   |

---

### Alert level B

|                   |                                                            |         |            |
|-------------------|------------------------------------------------------------|---------|------------|
| RINTA01_ALERT_3_B | The value of Rint is greater than 0.18                     |         |            |
|                   | Rint given                                                 | 0.183   |            |
| THETM01_ALERT_3_B | The value of sine(theta_max)/wavelength is less than 0.575 |         |            |
|                   | Calculated sin(theta_max)/wavelength =                     | 0.5747  |            |
| PLAT020_ALERT_3_B | The Value of Rint is Greater Than 0.12 .....               | 0.183   | Report     |
| PLAT082_ALERT_2_B | High R1 Value .....                                        | 0.16    | Report     |
| PLAT201_ALERT_2_B | Isotropic non-H Atoms in Main Residue(s) .....             | 6       | Report     |
| PLAT220_ALERT_2_B | Non-Solvent Resd 2 C Ueq(max)/Ueq(min) Range               | 7.0     | Ratio      |
| PLAT241_ALERT_2_B | High 'MainMol' Ueq as Compared to Neighbors of             | C2      | Check      |
| PLAT241_ALERT_2_B | High 'MainMol' Ueq as Compared to Neighbors of             | C3      | Check      |
| PLAT340_ALERT_3_B | Low Bond Precision on C-C Bonds .....                      | 0.01543 | Ang.       |
| PLAT360_ALERT_2_B | Short C(sp3)-C(sp3) Bond C4AA - C3AA                       | 1.26    | Ang.       |
| PLAT369_ALERT_2_B | Long C(sp2)-C(sp2) Bond C9 - C28                           | 1.57    | Ang.       |
| PLAT911_ALERT_3_B | Missing FCF Refl Between Thmin & STh/L=                    | 0.575   | 396 Report |
| PLAT934_ALERT_3_B | Number of (Iobs-Icalc)/SigmaW > 10 Outliers ....           | 5       | Check      |

---

### Alert level C

|                   |                                                  |                             |             |
|-------------------|--------------------------------------------------|-----------------------------|-------------|
| PLAT018_ALERT_1_C | _diffn_measured_fraction_theta_max .NE.*_full    |                             | ! Check     |
| PLAT052_ALERT_1_C | Info on Absorption Correction Method             | Not Given                   | Please Do ! |
| PLAT141_ALERT_4_C | s.u. on a - Axis Small or Missing .....          | 0.00000                     | Ang.        |
| PLAT142_ALERT_4_C | s.u. on b - Axis Small or Missing .....          | 0.00000                     | Ang.        |
| PLAT143_ALERT_4_C | s.u. on c - Axis Small or Missing .....          | 0.00000                     | Ang.        |
| PLAT144_ALERT_4_C | s.u. on alpha Small or Missing .....             | 0.0000                      | Degree      |
| PLAT145_ALERT_4_C | s.u. on beta Small or Missing .....              | 0.0000                      | Degree      |
| PLAT146_ALERT_4_C | s.u. on gamma Small or Missing .....             | 0.0000                      | Degree      |
| PLAT151_ALERT_1_C | No s.u. (esd) Given on Volume .....              |                             | Please Do ! |
| PLAT213_ALERT_2_C | Atom C3                                          | has ADP max/min Ratio ..... | 3.4 prolat  |
| PLAT213_ALERT_2_C | Atom C2AA                                        | has ADP max/min Ratio ..... | 3.2 prolat  |
| PLAT213_ALERT_2_C | Atom C6AA                                        | has ADP max/min Ratio ..... | 3.1 prolat  |
| PLAT220_ALERT_2_C | Non-Solvent Resd 1 C Ueq(max)/Ueq(min) Range     | 3.7                         | Ratio       |
| PLAT222_ALERT_3_C | Non-Solv. Resd 1 H Uiso(max)/Uiso(min) Range     | 4.1                         | Ratio       |
| PLAT222_ALERT_3_C | Non-Solv. Resd 2 H Uiso(max)/Uiso(min) Range     | 8.8                         | Ratio       |
| PLAT234_ALERT_4_C | Large Hirshfeld Difference C31 --C33             | 0.24                        | Ang.        |
| PLAT234_ALERT_4_C | Large Hirshfeld Difference C31 --C33A            | 0.18                        | Ang.        |
| PLAT234_ALERT_4_C | Large Hirshfeld Difference O1BA --C25            | 0.16                        | Ang.        |
| PLAT241_ALERT_2_C | High 'MainMol' Ueq as Compared to Neighbors of   | C3AA                        | Check       |
| PLAT241_ALERT_2_C | High 'MainMol' Ueq as Compared to Neighbors of   | C31                         | Check       |
| PLAT242_ALERT_2_C | Low 'MainMol' Ueq as Compared to Neighbors of    | C23                         | Check       |
| PLAT242_ALERT_2_C | Low 'MainMol' Ueq as Compared to Neighbors of    | C20                         | Check       |
| PLAT242_ALERT_2_C | Low 'MainMol' Ueq as Compared to Neighbors of    | C30                         | Check       |
| PLAT250_ALERT_2_C | Large U3/U1 Ratio for Average U(i,j) Tensor .... | 3.1                         | Note        |
| PLAT369_ALERT_2_C | Long C(sp2)-C(sp2) Bond C6 - C27                 | 1.55                        | Ang.        |
| PLAT369_ALERT_2_C | Long C(sp2)-C(sp2) Bond C7 - C24                 | 1.56                        | Ang.        |
| PLAT369_ALERT_2_C | Long C(sp2)-C(sp2) Bond C13 - C25                | 1.53                        | Ang.        |
| PLAT906_ALERT_3_C | Large K Value in the Analysis of Variance .....  | 14.040                      | Check       |
| PLAT906_ALERT_3_C | Large K Value in the Analysis of Variance .....  | 3.011                       | Check       |
| PLAT913_ALERT_3_C | Missing # of Very Strong Reflections in FCF .... | 7                           | Note        |
| PLAT918_ALERT_3_C | Reflection(s) with I(obs) much Smaller I(calc) . | 3                           | Check       |
| PLAT977_ALERT_2_C | Check Negative Difference Density on H15A        | -0.31                       | eA-3        |
| PLAT978_ALERT_2_C | Number C-C Bonds with Positive Residual Density. | 0                           | Info        |

---

### Alert level G

FORMU01\_ALERT\_1\_G There is a discrepancy between the atom counts in the  
                   \_chemical\_formula\_sum and \_chemical\_formula\_moiety. This is  
                   usually due to the moiety formula being in the wrong format.  
                   Atom count from \_chemical\_formula\_sum: C42 H41 Cl3 N2 O6  
                   Atom count from \_chemical\_formula\_moiety:C42 H40.96 Cl3.04 N2 O6

|                   |                                                  |         |              |
|-------------------|--------------------------------------------------|---------|--------------|
| PLAT002_ALERT_2_G | Number of Distance or Angle Restraints on AtSite | 13      | Note         |
| PLAT003_ALERT_2_G | Number of Uiso or Uij Restrained non-H Atoms ... | 18      | Report       |
| PLAT042_ALERT_1_G | Calc. and Reported MoietyFormula Strings Differ  |         | Please Check |
| PLAT045_ALERT_1_G | Calculated and Reported Z Differ by a Factor ... | 0.50    | Check        |
| PLAT072_ALERT_2_G | SHELXL First Parameter in WGHT Unusually Large   | 0.20    | Report       |
| PLAT092_ALERT_4_G | Check: Wavelength Given is not Cu,Ga,Mo,Ag,In Ka | 0.68882 | Ang.         |
| PLAT154_ALERT_1_G | The s.u.'s on the Cell Angles are Equal ..(Note) | 0.      | Degree       |
| PLAT171_ALERT_4_G | The CIF-Embedded .res File Contains EADP Records | 12      | Report       |
| PLAT172_ALERT_4_G | The CIF-Embedded .res File Contains DFIX Records | 6       | Report       |
| PLAT177_ALERT_4_G | The CIF-Embedded .res File Contains DELU Records | 4       | Report       |
| PLAT178_ALERT_4_G | The CIF-Embedded .res File Contains SIMU Records | 4       | Report       |
| PLAT199_ALERT_1_G | Reported _cell_measurement_temperature ..... (K) | 293     | Check        |
| PLAT200_ALERT_1_G | Reported _diffrn_ambient_temperature ..... (K)   | 293     | Check        |
| PLAT301_ALERT_3_G | Main Residue Disorder .....(Resd 1 )             | 26%     | Note         |
| PLAT301_ALERT_3_G | Main Residue Disorder .....(Resd 2 )             | 19%     | Note         |
| PLAT333_ALERT_2_G | Large Aver C6-Ring C-C Dist. C0BA -C21_b         | 1.44    | Ang.         |
| PLAT333_ALERT_2_G | Large Aver C6-Ring C-C Dist. C14 -C22A           | 1.44    | Ang.         |
| PLAT333_ALERT_2_G | Large Aver C6-Ring C-C Dist. C0AA -C8AA_a        | 1.43    | Ang.         |
| PLAT333_ALERT_2_G | Large Aver C6-Ring C-C Dist. C2BA -C19           | 1.44    | Ang.         |
| PLAT343_ALERT_2_G | Unusual sp3Angle Range in Main Residue for       | C2AA    | Check        |
| PLAT398_ALERT_2_G | Deviating C-O-C Angle From 120 for O3            | 108.5   | Degree       |
| PLAT398_ALERT_2_G | Deviating C-O-C Angle From 120 for O2AA          | 108.8   | Degree       |
| PLAT720_ALERT_4_G | Number of Unusual/Non-Standard Labels .....      | 45      | Note         |
| PLAT773_ALERT_2_G | Check long C-C Bond in CIF: C2 --C32A            | 1.72    | Ang.         |
| PLAT860_ALERT_3_G | Number of Least-Squares Restraints .....         | 154     | Note         |
| PLAT909_ALERT_3_G | Percentage of I>2sig(I) Data at Theta(Max) Still | 47%     | Note         |

---

3 **ALERT level A** = Most likely a serious problem - resolve or explain  
 13 **ALERT level B** = A potentially serious problem, consider carefully  
 33 **ALERT level C** = Check. Ensure it is not caused by an omission or oversight  
 27 **ALERT level G** = General information/check it is not something unexpected

9 ALERT type 1 CIF construction/syntax error, inconsistent or missing data  
 35 ALERT type 2 Indicator that the structure model may be wrong or deficient  
 17 ALERT type 3 Indicator that the structure quality may be low  
 15 ALERT type 4 Improvement, methodology, query or suggestion  
 0 ALERT type 5 Informative message, check

---

It is advisable to attempt to resolve as many as possible of the alerts in all categories. Often the minor alerts point to easily fixed oversights, errors and omissions in your CIF or refinement strategy, so attention to these fine details can be worthwhile. In order to resolve some of the more serious problems it may be necessary to carry out additional measurements or structure refinements. However, the purpose of your study may justify the reported deviations and the more serious of these should normally be commented upon in the discussion or experimental section of a paper or in the "special\_details" fields of the CIF. checkCIF was carefully designed to identify outliers and unusual parameters, but every test has its limitations and alerts that are not important in a particular case may appear. Conversely, the absence of alerts does not guarantee there are no aspects of the results needing attention. It is up to the individual to critically assess their own results and, if necessary, seek expert advice.

### **Publication of your CIF in IUCr journals**

A basic structural check has been run on your CIF. These basic checks will be run on all CIFs submitted for publication in IUCr journals (*Acta Crystallographica*, *Journal of Applied Crystallography*, *Journal of Synchrotron Radiation*); however, if you intend to submit to *Acta Crystallographica Section C* or *E* or *IUCrData*, you should make sure that full publication checks are run on the final version of your CIF prior to submission.

### **Publication of your CIF in other journals**

Please refer to the *Notes for Authors* of the relevant journal for any special instructions relating to CIF submission.

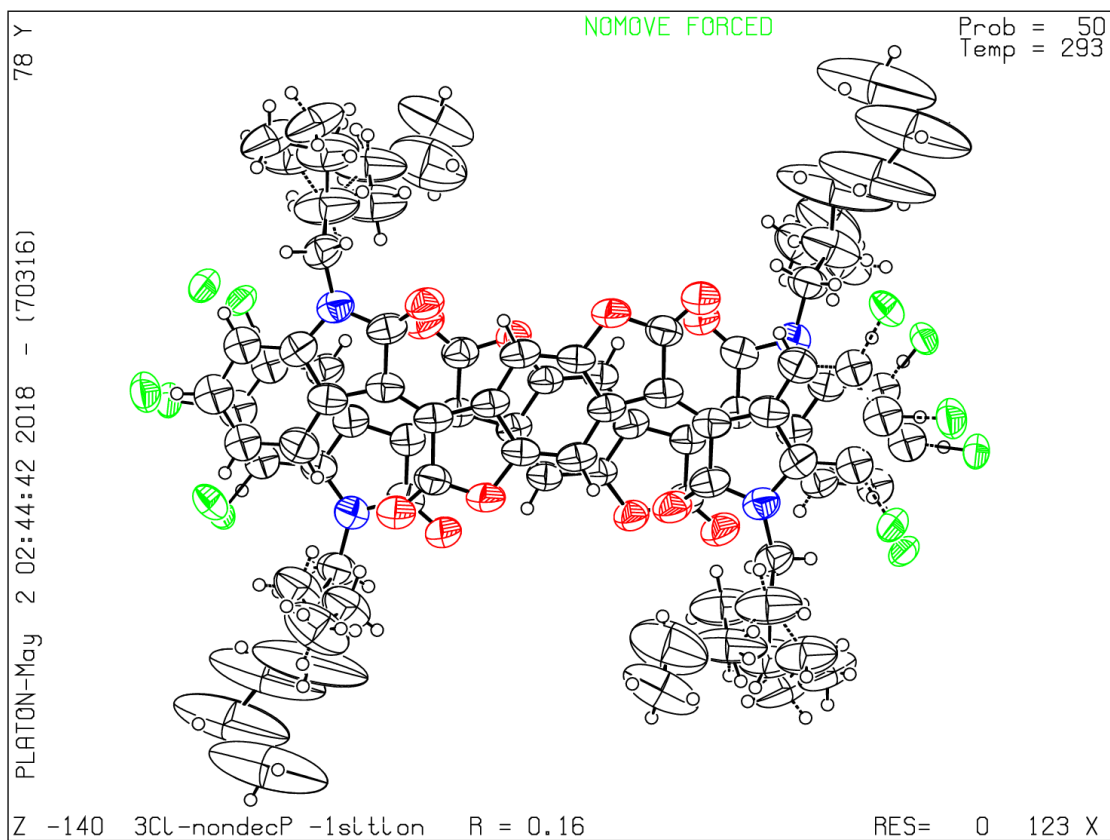

Supplement: Supplementary file 3 [file 14570123]
