# Supplementary material
Source: publisher figshare collection journal article supplement (https://acs.figshare.com/ndownloader/files/14570123)

# checkCIF/PLATON report

Structure factors have been supplied for datablock(s) 3Cl-decomposition

THIS REPORT IS FOR GUIDANCE ONLY. IF USED AS PART OF A REVIEW PROCEDURE FOR PUBLICATION, IT SHOULD NOT REPLACE THE EXPERTISE OF AN EXPERIENCED CRYSTALLOGRAPHIC REFEREE.

No syntax errors found.      CIF dictionary      Interpreting this report

## Datablock: 3Cl-decomposition

---

Bond precision:    C-C = 0.0086 Å

Wavelength=1.54178

Cell:                a=7.4241(5)                b=12.4935(9)                c=20.8699(12)  
                      alpha=84.241(6)        beta=83.819(5)        gamma=83.303(6)  
Temperature:        293 K

|                | Calculated                                          | Reported                   |
|----------------|-----------------------------------------------------|----------------------------|
| Volume         | 1903.8(2)                                           | 1903.8(2)                  |
| Space group    | P -1                                                | P -1                       |
| Hall group     | -P 1                                                | -P 1                       |
| Moiety formula | C42 H39.19 Cl4.81 N2 O6,<br>C42 H39.44 Cl4.56 N2 O6 | 2(C42 H39.19 Cl4.81 N2 O6) |
| Sum formula    | C84 H78.63 Cl9.37 N4 O12                            | C84 H78.63 Cl9.37 N4 O12   |
| Mr             | 1668.37                                             | 1668.30                    |
| Dx,g cm-3      | 1.455                                               | 1.455                      |
| Z              | 1                                                   | 1                          |
| Mu (mm-1)      | 3.699                                               | 3.698                      |
| F000           | 866.0                                               | 866.0                      |
| F000'          | 871.54                                              |                            |
| h,k,lmax       | 8,14,24                                             | 8,14,23                    |
| Nref           | 6117                                                | 5920                       |
| Tmin,Tmax      | 0.674,0.691                                         | 0.554,0.725                |
| Tmin'          | 0.547                                               |                            |

Correction method= # Reported T Limits: Tmin=0.554 Tmax=0.725  
AbsCorr = EMPIRICAL

Data completeness= 0.968

Theta(max)= 62.702

R(reflections)= 0.0919( 3634)

wR2(reflections)= 0.2651( 5920)

S = 1.027

Npar= 515

---

The following ALERTS were generated. Each ALERT has the format

**test-name\_ALERT\_alert-type\_alert-level.**

Click on the hyperlinks for more details of the test.

---

### Alert level B

|                   |                                                |                         |              |
|-------------------|------------------------------------------------|-------------------------|--------------|
| PLAT220_ALERT_2_B | Non-Solvent Resd 1 C                           | Ueq(max)/Ueq(min) Range | 6.8 Ratio    |
| PLAT410_ALERT_2_B | Short Intra H...H Contact                      | H40A ..H46C             | 1.88 Ang.    |
| PLAT936_ALERT_2_B | The Embedded .res File Includes a DAMP Command | .                       | 500.0 Report |

---

### Alert level C

|                   |                                                            |                           |              |
|-------------------|------------------------------------------------------------|---------------------------|--------------|
| THETM01_ALERT_3_C | The value of sine(theta_max)/wavelength is less than 0.590 |                           |              |
|                   | Calculated sin(theta_max)/wavelength = 0.5764              |                           |              |
| PLAT018_ALERT_1_C | _diffrn_measured_fraction_theta_max .NE. *_full            |                           | ! Check      |
| PLAT077_ALERT_4_C | Unitcell Contains Non-integer Number of Atoms ..           |                           | Please Check |
| PLAT084_ALERT_3_C | High wR2 Value (i.e. > 0.25) .....                         | 0.27                      | Report       |
| PLAT222_ALERT_3_C | Non-Solv. Resd 1 H                                         | Uiso(max)/Uiso(min) Range | 8.2 Ratio    |
| PLAT234_ALERT_4_C | Large Hirshfeld Difference C35                             | --C37                     | 0.18 Ang.    |
| PLAT241_ALERT_2_C | High 'MainMol' Ueq as Compared to Neighbors of             | C36                       | Check        |
| PLAT241_ALERT_2_C | High 'MainMol' Ueq as Compared to Neighbors of             | C37                       | Check        |
| PLAT241_ALERT_2_C | High 'MainMol' Ueq as Compared to Neighbors of             | C33                       | Check        |
| PLAT241_ALERT_2_C | High 'MainMol' Ueq as Compared to Neighbors of             | C40                       | Check        |
| PLAT241_ALERT_2_C | High 'MainMol' Ueq as Compared to Neighbors of             | C42                       | Check        |
| PLAT241_ALERT_2_C | High 'MainMol' Ueq as Compared to Neighbors of             | C46                       | Check        |
| PLAT242_ALERT_2_C | Low 'MainMol' Ueq as Compared to Neighbors of              | C31                       | Check        |
| PLAT242_ALERT_2_C | Low 'MainMol' Ueq as Compared to Neighbors of              | C39                       | Check        |
| PLAT242_ALERT_2_C | Low 'MainMol' Ueq as Compared to Neighbors of              | C45                       | Check        |
| PLAT242_ALERT_2_C | Low 'MainMol' Ueq as Compared to Neighbors of              | C30                       | Check        |
| PLAT340_ALERT_3_C | Low Bond Precision on C-C Bonds .....                      | 0.0086                    | Ang.         |
| PLAT360_ALERT_2_C | Short C(sp3)-C(sp3) Bond C38                               | - C40                     | 1.42 Ang.    |
| PLAT410_ALERT_2_C | Short Intra H...H Contact                                  | H31B ..H35A               | 1.96 Ang.    |
| PLAT410_ALERT_2_C | Short Intra H...H Contact                                  | H30A ..H33A               | 1.95 Ang.    |
| PLAT410_ALERT_2_C | Short Intra H...H Contact                                  | H42B ..H43A               | 1.95 Ang.    |
| PLAT906_ALERT_3_C | Large K Value in the Analysis of Variance .....            | 8.063                     | Check        |
| PLAT906_ALERT_3_C | Large K Value in the Analysis of Variance .....            | 2.788                     | Check        |
| PLAT911_ALERT_3_C | Missing FCF Refl Between Thmin & STh/L=                    | 0.576                     | 195 Report   |

---

### Alert level G

|                   |                                                                                                                                                                                |           |              |
|-------------------|--------------------------------------------------------------------------------------------------------------------------------------------------------------------------------|-----------|--------------|
| FORMU01_ALERT_1_G | There is a discrepancy between the atom counts in the _chemical_formula_sum and _chemical_formula_moiety. This is usually due to the moiety formula being in the wrong format. |           |              |
|                   | Atom count from _chemical_formula_sum: C84 H78.62999 Cl9.37 N4 O12                                                                                                             |           |              |
|                   | Atom count from _chemical_formula_moiety: C84 H78.37999 Cl9.62 N4 O12                                                                                                          |           |              |
| PLAT002_ALERT_2_G | Number of Distance or Angle Restraints on AtSite                                                                                                                               | 18        | Note         |
| PLAT003_ALERT_2_G | Number of Uiso or Uij Restrained non-H Atoms ...                                                                                                                               | 16        | Report       |
| PLAT042_ALERT_1_G | Calc. and Reported MoietyFormula Strings Differ                                                                                                                                |           | Please Check |
| PLAT072_ALERT_2_G | SHELXL First Parameter in WGHT Unusually Large                                                                                                                                 | 0.11      | Report       |
| PLAT171_ALERT_4_G | The CIF-Embedded .res File Contains EADP Records                                                                                                                               | 8         | Report       |
| PLAT172_ALERT_4_G | The CIF-Embedded .res File Contains DFIX Records                                                                                                                               | 13        | Report       |
| PLAT177_ALERT_4_G | The CIF-Embedded .res File Contains DELU Records                                                                                                                               | 4         | Report       |
| PLAT178_ALERT_4_G | The CIF-Embedded .res File Contains SIMU Records                                                                                                                               | 4         | Report       |
| PLAT199_ALERT_1_G | Reported _cell_measurement_temperature .....                                                                                                                                   | 293       | Check        |
| PLAT200_ALERT_1_G | Reported _diffrn_ambient_temperature .....                                                                                                                                     | 293       | Check        |
| PLAT230_ALERT_2_G | Hirshfeld Test Diff for C33                                                                                                                                                    | --C43     | 6.7 s.u.     |
| PLAT301_ALERT_3_G | Main Residue Disorder .....                                                                                                                                                    | (Resd 1 ) | 23% Note     |
| PLAT302_ALERT_4_G | Anion/Solvent/Minor-Residue Disorder (Resd 2 )                                                                                                                                 |           | 22% Note     |
| PLAT398_ALERT_2_G | Deviating C-O-C Angle From 120 for O7AA                                                                                                                                        | 107.7     | Degree       |
| PLAT398_ALERT_2_G | Deviating C-O-C Angle From 120 for O2AA                                                                                                                                        | 108.2     | Degree       |
| PLAT720_ALERT_4_G | Number of Unusual/Non-Standard Labels .....                                                                                                                                    | 11        | Note         |

|                                                                    |               |          |
|--------------------------------------------------------------------|---------------|----------|
| PLAT793_ALERT_4_G Model has Chirality at C35                       | (Centro SPGR) | S Verify |
| PLAT860_ALERT_3_G Number of Least-Squares Restraints .....         |               | 105 Note |
| PLAT910_ALERT_3_G Missing # of FCF Reflection(s) Below Theta(Min). |               | 1 Note   |
| PLAT933_ALERT_2_G Number of OMIT Records in Embedded .res File ... |               | 11 Note  |
| PLAT978_ALERT_2_G Number C-C Bonds with Positive Residual Density. |               | 1 Info   |

---

|    |                      |                                                              |
|----|----------------------|--------------------------------------------------------------|
| 0  | <b>ALERT level A</b> | = Most likely a serious problem - resolve or explain         |
| 3  | <b>ALERT level B</b> | = A potentially serious problem, consider carefully          |
| 24 | <b>ALERT level C</b> | = Check. Ensure it is not caused by an omission or oversight |
| 22 | <b>ALERT level G</b> | = General information/check it is not something unexpected   |
|    |                      |                                                              |
| 5  | ALERT type 1         | CIF construction/syntax error, inconsistent or missing data  |
| 25 | ALERT type 2         | Indicator that the structure model may be wrong or deficient |
| 10 | ALERT type 3         | Indicator that the structure quality may be low              |
| 9  | ALERT type 4         | Improvement, methodology, query or suggestion                |
| 0  | ALERT type 5         | Informative message, check                                   |

---

It is advisable to attempt to resolve as many as possible of the alerts in all categories. Often the minor alerts point to easily fixed oversights, errors and omissions in your CIF or refinement strategy, so attention to these fine details can be worthwhile. In order to resolve some of the more serious problems it may be necessary to carry out additional measurements or structure refinements. However, the purpose of your study may justify the reported deviations and the more serious of these should normally be commented upon in the discussion or experimental section of a paper or in the "special\_details" fields of the CIF. checkCIF was carefully designed to identify outliers and unusual parameters, but every test has its limitations and alerts that are not important in a particular case may appear. Conversely, the absence of alerts does not guarantee there are no aspects of the results needing attention. It is up to the individual to critically assess their own results and, if necessary, seek expert advice.

### Publication of your CIF in IUCr journals

A basic structural check has been run on your CIF. These basic checks will be run on all CIFs submitted for publication in IUCr journals (*Acta Crystallographica*, *Journal of Applied Crystallography*, *Journal of Synchrotron Radiation*); however, if you intend to submit to *Acta Crystallographica Section C* or *E* or *IUCrData*, you should make sure that full publication checks are run on the final version of your CIF prior to submission.

### Publication of your CIF in other journals

Please refer to the *Notes for Authors* of the relevant journal for any special instructions relating to CIF submission.

---

**PLATON version of 23/04/2018; check.def file version of 23/04/2018**

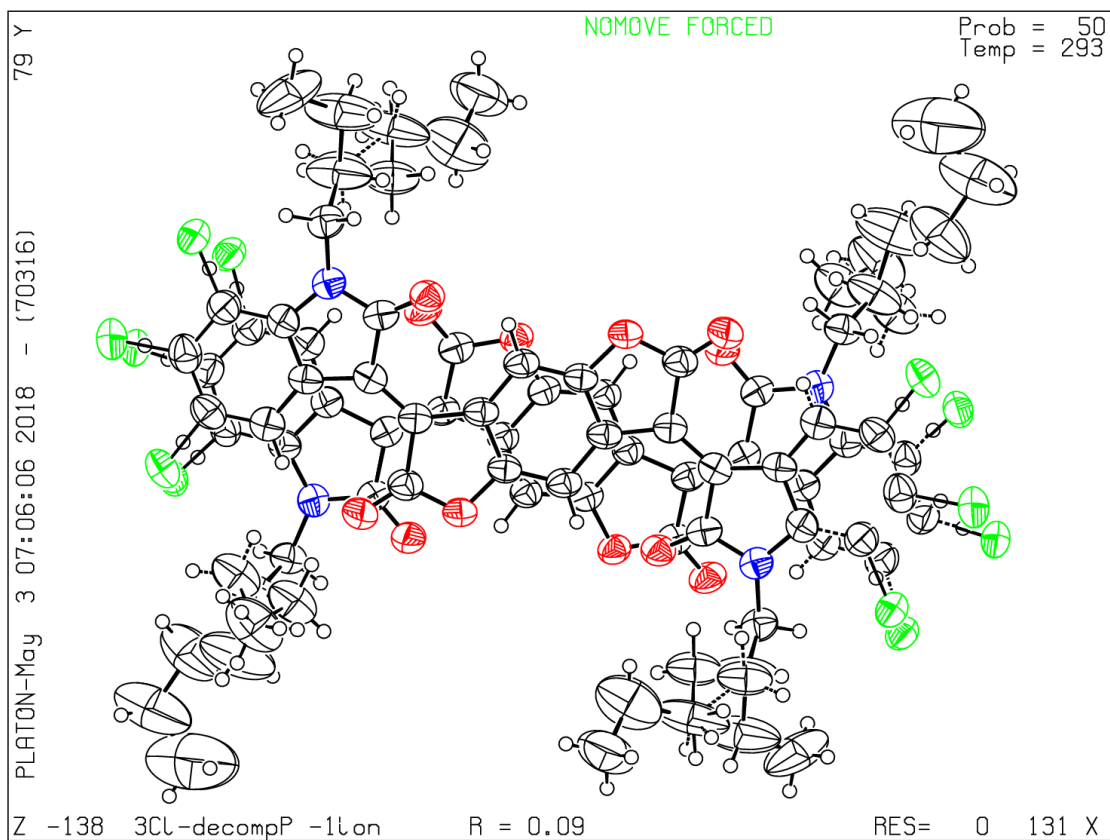

Supplement: Supplementary file 5 [file 14570123]
