# Supplementary material
Source: publisher figshare collection journal article supplement (https://acs.figshare.com/ndownloader/files/14570123)

# checkCIF/PLATON report

Structure factors have been supplied for datablock(s) 06F

THIS REPORT IS FOR GUIDANCE ONLY. IF USED AS PART OF A REVIEW PROCEDURE FOR PUBLICATION, IT SHOULD NOT REPLACE THE EXPERTISE OF AN EXPERIENCED CRYSTALLOGRAPHIC REFEREE.

No syntax errors found.      CIF dictionary      Interpreting this report

## Datablock: 06F

---

|                        |                                                                |                                                 |
|------------------------|----------------------------------------------------------------|-------------------------------------------------|
| Bond precision:        | C-C = 0.0088 A                                                 | Wavelength=0.68882                              |
| Cell:                  | a=7.44200                                                      | b=14.63500      c=19.31200                      |
|                        | alpha=108.2700                                                 | beta=98.4900      gamma=93.6900                 |
| Temperature:           | 293 K                                                          |                                                 |
|                        | Calculated                                                     | Reported                                        |
| Volume                 | 1961.668                                                       | 1962                                            |
| Space group            | P -1                                                           | P -1                                            |
| Hall group             | -P 1                                                           | -P 1                                            |
| Moiety formula         | C42 H34.46 F3.54 N2 O6,<br>C42 H41.54 N2 O6,<br>3.246(F), 6(H) | C21 H20.23 F1.77 N O3, C21<br>H20.77 F1.62 N O3 |
| Sum formula            | C84 H82 F6.79 N4 O12                                           | C42 H41 F3.37 N2 O6                             |
| Mr                     | 1468.47                                                        | 733.70                                          |
| Dx, g cm <sup>-3</sup> | 1.243                                                          | 1.242                                           |
| Z                      | 1                                                              | 2                                               |
| Mu (mm <sup>-1</sup> ) | 0.086                                                          | 0.088                                           |
| F000                   | 771.1                                                          | 771.0                                           |
| F000'                  | 771.46                                                         |                                                 |
| h,k,lmax               | 8,16,22                                                        | 7,16,22                                         |
| Nref                   | 6248                                                           | 5738                                            |
| Tmin,Tmax              |                                                                |                                                 |
| Tmin'                  |                                                                |                                                 |

Correction method= Not given

Data completeness= 0.918      Theta(max)= 23.320

R(reflections)= 0.1133( 3582)      wR2(reflections)= 0.3671( 5738)

S = 1.367      Npar= 509

---

The following ALERTS were generated. Each ALERT has the format

**test-name\_ALERT\_alert-type\_alert-level.**

Click on the hyperlinks for more details of the test.

---

### Alert level B

THETM01\_ALERT\_3\_B The value of  $\sin(\theta_{\max})/\lambda$  is less than 0.575  
Calculated  $\sin(\theta_{\max})/\lambda = 0.5747$   
PLAT084\_ALERT\_3\_B High  $wR_2$  Value (i.e.  $> 0.25$ ) ..... 0.37 Report  
PLAT241\_ALERT\_2\_B High 'MainMol' Ueq as Compared to Neighbors of C35 Check  
PLAT330\_ALERT\_2\_B Large Average Phenyl C-C Dist C2AA -C21A 1.42 Ang.  
PLAT911\_ALERT\_3\_B Missing FCF Refl Between Thmin & STh/L= 0.575 378 Report

---

### Alert level C

PLAT018\_ALERT\_1\_C \_diffn\_measured\_fraction\_theta\_max .NE. \*\_full ! Check  
PLAT041\_ALERT\_1\_C Calc. and Reported SumFormula Strings Differ Please Check  
PLAT077\_ALERT\_4\_C Unitcell Contains Non-integer Number of Atoms .. Please Check  
PLAT082\_ALERT\_2\_C High R1 Value ..... 0.11 Report  
PLAT141\_ALERT\_4\_C s.u. on a - Axis Small or Missing ..... 0.00000 Ang.  
PLAT142\_ALERT\_4\_C s.u. on b - Axis Small or Missing ..... 0.00000 Ang.  
PLAT143\_ALERT\_4\_C s.u. on c - Axis Small or Missing ..... 0.00000 Ang.  
PLAT144\_ALERT\_4\_C s.u. on alpha Small or Missing ..... 0.0000 Degree  
PLAT145\_ALERT\_4\_C s.u. on beta Small or Missing ..... 0.0000 Degree  
PLAT146\_ALERT\_4\_C s.u. on gamma Small or Missing ..... 0.0000 Degree  
PLAT151\_ALERT\_1\_C No s.u. (esd) Given on Volume ..... Please Do !  
PLAT220\_ALERT\_2\_C Non-Solvent Resd 1 C Ueq(max)/Ueq(min) Range 3.3 Ratio  
PLAT221\_ALERT\_2\_C Solv./Anion Resd 2 C Ueq(max)/Ueq(min) Range 5.1 Ratio  
PLAT223\_ALERT\_4\_C Solv./Anion Resd 2 H Ueq(max)/Ueq(min) Range 6.1 Ratio  
PLAT230\_ALERT\_2\_C Hirshfeld Test Diff for C34 --C37 . 5.4 s.u.  
PLAT230\_ALERT\_2\_C Hirshfeld Test Diff for C13 --C32 . 5.1 s.u.  
PLAT230\_ALERT\_2\_C Hirshfeld Test Diff for C14 --C20 . 7.0 s.u.  
PLAT234\_ALERT\_4\_C Large Hirshfeld Difference C37 --C39A 0.19 Ang.  
PLAT234\_ALERT\_4\_C Large Hirshfeld Difference C32 --C36 0.19 Ang.  
PLAT242\_ALERT\_2\_C Low 'MainMol' Ueq as Compared to Neighbors of C13 Check  
PLAT242\_ALERT\_2\_C Low 'MainMol' Ueq as Compared to Neighbors of C36 Check  
PLAT242\_ALERT\_2\_C Low 'MainMol' Ueq as Compared to Neighbors of C38 Check  
PLAT340\_ALERT\_3\_C Low Bond Precision on C-C Bonds ..... 0.00883 Ang.  
PLAT369\_ALERT\_2\_C Long C(sp2)-C(sp2) Bond C4 - C26 . 1.54 Ang.  
PLAT369\_ALERT\_2\_C Long C(sp2)-C(sp2) Bond C1BA - C29 . 1.55 Ang.  
PLAT369\_ALERT\_2\_C Long C(sp2)-C(sp2) Bond C7 - C10 . 1.56 Ang.  
PLAT369\_ALERT\_2\_C Long C(sp2)-C(sp2) Bond C0BA - C27 . 1.54 Ang.  
PLAT369\_ALERT\_2\_C Long C(sp2)-C(sp2) Bond C10 - C20 . 1.54 Ang.  
PLAT906\_ALERT\_3\_C Large K Value in the Analysis of Variance ..... 10.792 Check  
PLAT906\_ALERT\_3\_C Large K Value in the Analysis of Variance ..... 2.260 Check  
PLAT913\_ALERT\_3\_C Missing # of Very Strong Reflections in FCF .... 12 Note  
PLAT918\_ALERT\_3\_C Reflection(s) with I(obs) much Smaller I(calc) . 2 Check  
PLAT934\_ALERT\_3\_C Number of (Iobs-Icalc)/SigmaW > 10 Outliers .... 1 Check

---

### Alert level G

FORMU01\_ALERT\_1\_G There is a discrepancy between the atom counts in the  
\_chemical\_formula\_sum and \_chemical\_formula\_moiety. This is  
usually due to the moiety formula being in the wrong format.  
Atom count from \_chemical\_formula\_sum: C42 H41 F3.37 N2 O6  
Atom count from \_chemical\_formula\_moiety: C42 H41 F3.39 N2 O6  
FORMU01\_ALERT\_2\_G There is a discrepancy between the atom counts in the  
\_chemical\_formula\_sum and the formula from the \_atom\_site\* data.  
Atom count from \_chemical\_formula\_sum: C42 H41 F3.37 N2 O6  
Atom count from the \_atom\_site data: C42 H41 F3.393 N2 O6  
ABSMU01\_ALERT\_1\_G Calculation of \_exptl\_absorpt\_correction\_mu

not performed for this radiation type.

|                   |                                                      |       |              |
|-------------------|------------------------------------------------------|-------|--------------|
| PLAT002_ALERT_2_G | Number of Distance or Angle Restraints on AtSite     | 12    | Note         |
| PLAT003_ALERT_2_G | Number of Uiso or Uij Restrained non-H Atoms ...     | 7     | Report       |
| PLAT042_ALERT_1_G | Calc. and Reported MoietyFormula Strings Differ      |       | Please Check |
| PLAT045_ALERT_1_G | Calculated and Reported Z Differ by a Factor ...     | 0.50  | Check        |
| PLAT072_ALERT_2_G | SHELXL First Parameter in WGHT Unusually Large       | 0.20  | Report       |
| PLAT154_ALERT_1_G | The s.u.'s on the Cell Angles are Equal ..(Note)     | 0.    | Degree       |
| PLAT171_ALERT_4_G | The CIF-Embedded .res File Contains EADP Records     | 12    | Report       |
| PLAT172_ALERT_4_G | The CIF-Embedded .res File Contains DFIX Records     | 10    | Report       |
| PLAT177_ALERT_4_G | The CIF-Embedded .res File Contains DELU Records     | 2     | Report       |
| PLAT178_ALERT_4_G | The CIF-Embedded .res File Contains SIMU Records     | 2     | Report       |
| PLAT199_ALERT_1_G | Reported _cell_measurement_temperature ..... (K)     | 293   | Check        |
| PLAT200_ALERT_1_G | Reported _diffrn_ambient_temperature ..... (K)       | 293   | Check        |
| PLAT301_ALERT_3_G | Main Residue Disorder .....(Resd 1 )                 | 27%   | Note         |
| PLAT302_ALERT_4_G | Anion/Solvent/Minor-Residue Disorder (Resd 2 )       | 10%   | Note         |
| PLAT302_ALERT_4_G | Anion/Solvent/Minor-Residue Disorder (Resd 3 )       | 100%  | Note         |
| PLAT302_ALERT_4_G | Anion/Solvent/Minor-Residue Disorder (Resd 4 )       | 100%  | Note         |
| PLAT302_ALERT_4_G | Anion/Solvent/Minor-Residue Disorder (Resd 5 )       | 100%  | Note         |
| PLAT304_ALERT_4_G | Non-Integer Number of Atoms in ..... Resd 2          | 91.54 | Check        |
| PLAT304_ALERT_4_G | Non-Integer Number of Atoms in ..... Resd 3          | 0.52  | Check        |
| PLAT304_ALERT_4_G | Non-Integer Number of Atoms in ..... Resd 4          | 0.57  | Check        |
| PLAT304_ALERT_4_G | Non-Integer Number of Atoms in ..... Resd 5          | 0.54  | Check        |
| PLAT304_ALERT_4_G | Non-Integer Number of Atoms in ..... Resd 6          | 0.76  | Check        |
| PLAT304_ALERT_4_G | Non-Integer Number of Atoms in ..... Resd 7          | 0.76  | Check        |
| PLAT304_ALERT_4_G | Non-Integer Number of Atoms in ..... Resd 8          | 0.76  | Check        |
| PLAT304_ALERT_4_G | Non-Integer Number of Atoms in ..... Resd 9          | 0.24  | Check        |
| PLAT304_ALERT_4_G | Non-Integer Number of Atoms in ..... Resd 10         | 0.24  | Check        |
| PLAT304_ALERT_4_G | Non-Integer Number of Atoms in ..... Resd 11         | 0.24  | Check        |
| PLAT333_ALERT_2_G | Large Aver C6-Ring C-C Dist. C1AA -C3AA_a            | 1.42  | Ang.         |
| PLAT333_ALERT_2_G | Large Aver C6-Ring C-C Dist. C2AA -C21               | 1.42  | Ang.         |
| PLAT333_ALERT_2_G | Large Aver C6-Ring C-C Dist. C9AA -C11_b             | 1.43  | Ang.         |
| PLAT398_ALERT_2_G | Deviating C-O-C Angle From 120 for O0AA              | 107.9 | Degree       |
| PLAT398_ALERT_2_G | Deviating C-O-C Angle From 120 for O3                | 107.6 | Degree       |
| PLAT432_ALERT_2_G | Short Inter X...Y Contact F24 ..C7AA                 | 2.46  | Ang.         |
| PLAT432_ALERT_2_G | Short Inter X...Y Contact F25 ..C14                  | 2.43  | Ang.         |
| PLAT720_ALERT_4_G | Number of Unusual/Non-Standard Labels .....          | 15    | Note         |
| PLAT773_ALERT_2_G | Check long C-C Bond in CIF: C35 --C31A               | 1.73  | Ang.         |
| PLAT790_ALERT_4_G | Centre of Gravity not Within Unit Cell: Resd. #<br>H | 6     | Note         |
| PLAT790_ALERT_4_G | Centre of Gravity not Within Unit Cell: Resd. #<br>H | 7     | Note         |
| PLAT790_ALERT_4_G | Centre of Gravity not Within Unit Cell: Resd. #<br>H | 8     | Note         |
| PLAT790_ALERT_4_G | Centre of Gravity not Within Unit Cell: Resd. #<br>H | 9     | Note         |
| PLAT790_ALERT_4_G | Centre of Gravity not Within Unit Cell: Resd. #<br>H | 10    | Note         |
| PLAT790_ALERT_4_G | Centre of Gravity not Within Unit Cell: Resd. #<br>H | 11    | Note         |
| PLAT793_ALERT_4_G | Model has Chirality at C32 (Centro SPGR)             | R     | Verify       |
| PLAT860_ALERT_3_G | Number of Least-Squares Restraints .....             | 49    | Note         |
| PLAT910_ALERT_3_G | Missing # of FCF Reflection(s) Below Theta(Min).     | 1     | Note         |
| PLAT933_ALERT_2_G | Number of OMIT Records in Embedded .res File ...     | 26    | Note         |
| PLAT978_ALERT_2_G | Number C-C Bonds with Positive Residual Density.     | 4     | Info         |

---

0 **ALERT level A** = Most likely a serious problem - resolve or explain  
5 **ALERT level B** = A potentially serious problem, consider carefully  
33 **ALERT level C** = Check. Ensure it is not caused by an omission or oversight  
50 **ALERT level G** = General information/check it is not something unexpected

10 ALERT type 1 CIF construction/syntax error, inconsistent or missing data

30 ALERT type 2 Indicator that the structure model may be wrong or deficient  
12 ALERT type 3 Indicator that the structure quality may be low  
36 ALERT type 4 Improvement, methodology, query or suggestion  
0 ALERT type 5 Informative message, check

---

It is advisable to attempt to resolve as many as possible of the alerts in all categories. Often the minor alerts point to easily fixed oversights, errors and omissions in your CIF or refinement strategy, so attention to these fine details can be worthwhile. In order to resolve some of the more serious problems it may be necessary to carry out additional measurements or structure refinements. However, the purpose of your study may justify the reported deviations and the more serious of these should normally be commented upon in the discussion or experimental section of a paper or in the "special\_details" fields of the CIF. checkCIF was carefully designed to identify outliers and unusual parameters, but every test has its limitations and alerts that are not important in a particular case may appear. Conversely, the absence of alerts does not guarantee there are no aspects of the results needing attention. It is up to the individual to critically assess their own results and, if necessary, seek expert advice.

### **Publication of your CIF in IUCr journals**

A basic structural check has been run on your CIF. These basic checks will be run on all CIFs submitted for publication in IUCr journals (*Acta Crystallographica*, *Journal of Applied Crystallography*, *Journal of Synchrotron Radiation*); however, if you intend to submit to *Acta Crystallographica Section C* or *E* or *IUCrData*, you should make sure that full publication checks are run on the final version of your CIF prior to submission.

### **Publication of your CIF in other journals**

Please refer to the *Notes for Authors* of the relevant journal for any special instructions relating to CIF submission.

---

**PLATON version of 23/04/2018; check.def file version of 23/04/2018**

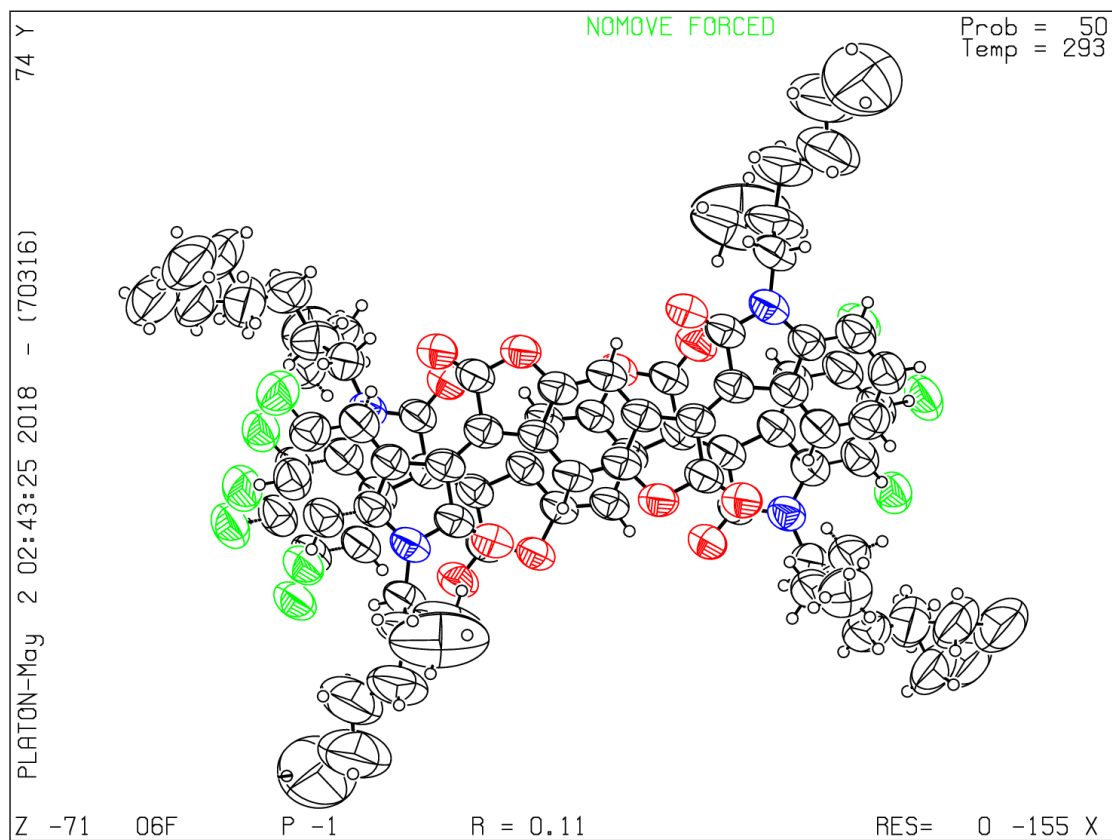

Supplement: Supplementary file 1 [file 14570123]
