# Supplementary material
Source: publisher figshare collection journal article supplement (https://acs.figshare.com/ndownloader/files/14570123)

# checkCIF/PLATON report

Structure factors have been supplied for datablock(s) 06Cl

THIS REPORT IS FOR GUIDANCE ONLY. IF USED AS PART OF A REVIEW PROCEDURE FOR PUBLICATION, IT SHOULD NOT REPLACE THE EXPERTISE OF AN EXPERIENCED CRYSTALLOGRAPHIC REFEREE.

No syntax errors found.      CIF dictionary      Interpreting this report

## Datablock: 06Cl

---

|                 |                                                                       |                                                   |
|-----------------|-----------------------------------------------------------------------|---------------------------------------------------|
| Bond precision: | C-C = 0.0086 A                                                        | Wavelength=0.68882                                |
| Cell:           | a=7.46400                                                             | b=12.49300      c=21.02700                        |
|                 | alpha=83.9600                                                         | beta=83.5800      gamma=83.2500                   |
| Temperature:    | 293 K                                                                 |                                                   |
|                 | Calculated                                                            | Reported                                          |
| Volume          | 1926.478                                                              | 1927                                              |
| Space group     | P -1                                                                  | P -1                                              |
| Hall group      | -P 1                                                                  | -P 1                                              |
| Moiety formula  | C42 H39.76 N2 O6, C36<br>H26.24 N2 O6, 2(C2 H5),<br>11.026(Cl), 2(C H | C21 H21.12 Cl2.77 N O3,<br>C21 H19.88 Cl2.74 N O3 |
| Sum formula     | C84 H82 Cl11.03 N4 O12                                                | C42 H39 Cl15.60 N2 O6                             |
| Mr              | 1730.41                                                               | 866.09                                            |
| Dx, g cm-3      | 1.492                                                                 | 1.493                                             |
| Z               | 1                                                                     | 2                                                 |
| Mu (mm-1)       | 0.421                                                                 | 0.435                                             |
| F000            | 897.4                                                                 | 896.0                                             |
| F000'           | 899.30                                                                |                                                   |
| h,k,lmax        | 8,14,24                                                               | 8,14,24                                           |
| Nref            | 6139                                                                  | 5405                                              |
| Tmin,Tmax       | 0.969,0.991                                                           |                                                   |
| Tmin'           | 0.805                                                                 |                                                   |

Correction method= Not given

Data completeness= 0.880      Theta(max)= 23.318

R(reflections)= 0.0934( 5255)      wR2(reflections)= 0.2203( 5405)

S = 1.104      Npar= 535

---

The following ALERTS were generated. Each ALERT has the format

**test-name\_ALERT\_alert-type\_alert-level.**

Click on the hyperlinks for more details of the test.

---

### Alert level B

THETM01\_ALERT\_3\_B The value of  $\sin(\theta_{\max})/\lambda$  is less than 0.575

Calculated  $\sin(\theta_{\max})/\lambda = 0.5747$

PLAT911\_ALERT\_3\_B Missing FCF Refl Between Thmin & STh/L= 0.575 728 Report

---

### Alert level C

PLAT018\_ALERT\_1\_C \_diffn\_measured\_fraction\_theta\_max .NE. \*\_full ! Check  
PLAT041\_ALERT\_1\_C Calc. and Reported SumFormula Strings Differ Please Check  
PLAT052\_ALERT\_1\_C Info on Absorption Correction Method Not Given Please Do !  
PLAT068\_ALERT\_1\_C Reported F000 Differs from Calcd (or Missing)... Please Check  
PLAT141\_ALERT\_4\_C s.u. on a - Axis Small or Missing ..... 0.00000 Ang.  
PLAT142\_ALERT\_4\_C s.u. on b - Axis Small or Missing ..... 0.00000 Ang.  
PLAT143\_ALERT\_4\_C s.u. on c - Axis Small or Missing ..... 0.00000 Ang.  
PLAT144\_ALERT\_4\_C s.u. on alpha Small or Missing ..... 0.0000 Degree  
PLAT145\_ALERT\_4\_C s.u. on beta Small or Missing ..... 0.0000 Degree  
PLAT146\_ALERT\_4\_C s.u. on gamma Small or Missing ..... 0.0000 Degree  
PLAT151\_ALERT\_1\_C No s.u. (esd) Given on Volume ..... Please Do !  
PLAT213\_ALERT\_2\_C Atom C7 has ADP max/min Ratio ..... 3.4 prolat  
PLAT213\_ALERT\_2\_C Atom C31 has ADP max/min Ratio ..... 3.1 prolat  
PLAT220\_ALERT\_2\_C Non-Solvent Resd 1 C Ueq(max)/Ueq(min) Range 4.9 Ratio  
PLAT222\_ALERT\_3\_C Non-Solv. Resd 1 H Uiso(max)/Uiso(min) Range 5.2 Ratio  
PLAT234\_ALERT\_4\_C Large Hirshfeld Difference C2 --C31 0.18 Ang.  
PLAT234\_ALERT\_4\_C Large Hirshfeld Difference C1 --C4A 0.19 Ang.  
PLAT234\_ALERT\_4\_C Large Hirshfeld Difference C33 --C30A 0.18 Ang.  
PLAT241\_ALERT\_2\_C High 'MainMol' Ueq as Compared to Neighbors of C3 Check  
PLAT241\_ALERT\_2\_C High 'MainMol' Ueq as Compared to Neighbors of C7 Check  
PLAT241\_ALERT\_2\_C High 'MainMol' Ueq as Compared to Neighbors of C31 Check  
PLAT241\_ALERT\_2\_C High 'MainMol' Ueq as Compared to Neighbors of C1 Check  
PLAT241\_ALERT\_2\_C High 'MainMol' Ueq as Compared to Neighbors of C33 Check  
PLAT242\_ALERT\_2\_C Low 'MainMol' Ueq as Compared to Neighbors of C22 Check  
PLAT243\_ALERT\_4\_C High 'Solvent' Ueq as Compared to Neighbors of C6 Check  
PLAT250\_ALERT\_2\_C Large U3/U1 Ratio for Average U(i,j) Tensor .... 2.5 Note  
PLAT250\_ALERT\_2\_C Large U3/U1 Ratio for Average U(i,j) Tensor .... 2.3 Note  
PLAT340\_ALERT\_3\_C Low Bond Precision on C-C Bonds ..... 0.00858 Ang.  
PLAT410\_ALERT\_2\_C Short Intra H...H Contact H3A ..H7BD 1.92 Ang.  
PLAT410\_ALERT\_2\_C Short Intra H...H Contact H22B ..H31A 1.99 Ang.  
PLAT906\_ALERT\_3\_C Large K Value in the Analysis of Variance ..... 7.059 Check  
PLAT910\_ALERT\_3\_C Missing # of FCF Reflection(s) Below Theta(Min). 6 Note  
PLAT913\_ALERT\_3\_C Missing # of Very Strong Reflections in FCF .... 70 Note  
PLAT922\_ALERT\_1\_C wr2 in the CIF and FCF Differ by ..... 0.0015 Check

---

### Alert level G

FORMU01\_ALERT\_1\_G There is a discrepancy between the atom counts in the  
\_chemical\_formula\_sum and \_chemical\_formula\_moiety. This is  
usually due to the moiety formula being in the wrong format.

Atom count from \_chemical\_formula\_sum: C42 H39 Cl5.6 N2 O6

Atom count from \_chemical\_formula\_moiety: C42 H41 Cl5.51 N2 O6

FORMU01\_ALERT\_2\_G There is a discrepancy between the atom counts in the  
\_chemical\_formula\_sum and the formula from the \_atom\_site\* data.

Atom count from \_chemical\_formula\_sum: C42 H39 Cl5.6 N2 O6

Atom count from the \_atom\_site data: C42 H41 Cl5.513 N2 O6

CELLZ01\_ALERT\_1\_G Difference between formula and atom\_site contents detected.

CELLZ01\_ALERT\_1\_G ALERT: Large difference may be due to a  
symmetry error - see SYMMG tests

From the CIF: \_cell\_formula\_units\_Z 2  
 From the CIF: \_chemical\_formula\_sum C42 H39 Cl5.60 N2 O6  
 TEST: Compare cell contents of formula and atom\_site data

| atom              | Z*formula                                        | cif sites | diff    |              |
|-------------------|--------------------------------------------------|-----------|---------|--------------|
| C                 | 84.00                                            | 84.00     | 0.00    |              |
| H                 | 78.00                                            | 82.00     | -4.00   |              |
| Cl                | 11.20                                            | 11.03     | 0.17    |              |
| N                 | 4.00                                             | 4.00      | 0.00    |              |
| O                 | 12.00                                            | 12.00     | 0.00    |              |
| PLAT002_ALERT_2_G | Number of Distance or Angle Restraints on AtSite |           | 11      | Note         |
| PLAT003_ALERT_2_G | Number of Uiso or Uij Restrained non-H Atoms ... |           | 7       | Report       |
| PLAT042_ALERT_1_G | Calc. and Reported MoietyFormula Strings Differ  |           |         | Please Check |
| PLAT045_ALERT_1_G | Calculated and Reported Z Differ by a Factor ... |           | 0.50    | Check        |
| PLAT083_ALERT_2_G | SHELXL Second Parameter in WGHT Unusually Large  |           | 8.17    | Why ?        |
| PLAT092_ALERT_4_G | Check: Wavelength Given is not Cu,Ga,Mo,Ag,In Ka |           | 0.68882 | Ang.         |
| PLAT154_ALERT_1_G | The s.u.'s on the Cell Angles are Equal ..(Note) |           | 0.      | Degree       |
| PLAT171_ALERT_4_G | The CIF-Embedded .res File Contains EADP Records |           | 13      | Report       |
| PLAT172_ALERT_4_G | The CIF-Embedded .res File Contains DFIX Records |           | 8       | Report       |
| PLAT177_ALERT_4_G | The CIF-Embedded .res File Contains DELU Records |           | 2       | Report       |
| PLAT178_ALERT_4_G | The CIF-Embedded .res File Contains SIMU Records |           | 2       | Report       |
| PLAT199_ALERT_1_G | Reported _cell_measurement_temperature ..... (K) |           | 293     | Check        |
| PLAT200_ALERT_1_G | Reported _diffrn_ambient_temperature ..... (K)   |           | 293     | Check        |
| PLAT301_ALERT_3_G | Main Residue Disorder .....(Resd 1 )             |           | 14%     | Note         |
| PLAT302_ALERT_4_G | Anion/Solvent/Minor-Residue Disorder (Resd 2 )   |           | 21%     | Note         |
| PLAT302_ALERT_4_G | Anion/Solvent/Minor-Residue Disorder (Resd 3 )   |           | 50%     | Note         |
| PLAT302_ALERT_4_G | Anion/Solvent/Minor-Residue Disorder (Resd 4 )   |           | 100%    | Note         |
| PLAT302_ALERT_4_G | Anion/Solvent/Minor-Residue Disorder (Resd 5 )   |           | 100%    | Note         |
| PLAT302_ALERT_4_G | Anion/Solvent/Minor-Residue Disorder (Resd 6 )   |           | 100%    | Note         |
| PLAT302_ALERT_4_G | Anion/Solvent/Minor-Residue Disorder (Resd 7 )   |           | 100%    | Note         |
| PLAT302_ALERT_4_G | Anion/Solvent/Minor-Residue Disorder (Resd 8 )   |           | 100%    | Note         |
| PLAT302_ALERT_4_G | Anion/Solvent/Minor-Residue Disorder (Resd 9 )   |           | 100%    | Note         |
| PLAT302_ALERT_4_G | Anion/Solvent/Minor-Residue Disorder (Resd 10 )  |           | 100%    | Note         |
| PLAT302_ALERT_4_G | Anion/Solvent/Minor-Residue Disorder (Resd 11 )  |           | 100%    | Note         |
| PLAT304_ALERT_4_G | Non-Integer Number of Atoms in ..... Resd 1      |           | 89.76   | Check        |
| PLAT304_ALERT_4_G | Non-Integer Number of Atoms in ..... Resd 2      |           | 70.24   | Check        |
| PLAT304_ALERT_4_G | Non-Integer Number of Atoms in ..... Resd 4      |           | 0.92    | Check        |
| PLAT304_ALERT_4_G | Non-Integer Number of Atoms in ..... Resd 5      |           | 0.93    | Check        |
| PLAT304_ALERT_4_G | Non-Integer Number of Atoms in ..... Resd 6      |           | 0.90    | Check        |
| PLAT304_ALERT_4_G | Non-Integer Number of Atoms in ..... Resd 7      |           | 0.93    | Check        |
| PLAT304_ALERT_4_G | Non-Integer Number of Atoms in ..... Resd 8      |           | 0.91    | Check        |
| PLAT304_ALERT_4_G | Non-Integer Number of Atoms in ..... Resd 9      |           | 0.92    | Check        |
| PLAT304_ALERT_4_G | Non-Integer Number of Atoms in ..... Resd 10     |           | 2.44    | Check        |
| PLAT304_ALERT_4_G | Non-Integer Number of Atoms in ..... Resd 11     |           | 1.56    | Check        |
| PLAT398_ALERT_2_G | Deviating C-O-C Angle From 120 for O1AA          |           | 108.0   | Degree       |
| PLAT398_ALERT_2_G | Deviating C-O-C Angle From 120 for O1BA          |           | 108.8   | Degree       |
| PLAT432_ALERT_2_G | Short Inter X...Y Contact Cl1 ..C23              |           | 2.68    | Ang.         |
| PLAT432_ALERT_2_G | Short Inter X...Y Contact Cl0A ..C11             |           | 2.74    | Ang.         |
| PLAT432_ALERT_2_G | Short Inter X...Y Contact Cl0A ..C19             |           | 3.17    | Ang.         |
| PLAT432_ALERT_2_G | Short Inter X...Y Contact Cl3 ..C12              |           | 2.73    | Ang.         |
| PLAT432_ALERT_2_G | Short Inter X...Y Contact Cl3 ..C22              |           | 3.17    | Ang.         |
| PLAT432_ALERT_2_G | Short Inter X...Y Contact Cl3A ..C15             |           | 2.68    | Ang.         |
| PLAT432_ALERT_2_G | Short Inter X...Y Contact N2 ..C32A              |           | 2.93    | Ang.         |
| PLAT432_ALERT_2_G | Short Inter X...Y Contact N2 ..C32               |           | 3.01    | Ang.         |
| PLAT432_ALERT_2_G | Short Inter X...Y Contact Cl ..C8A               |           | 2.43    | Ang.         |
| PLAT432_ALERT_2_G | Short Inter X...Y Contact Cl ..C8                |           | 2.43    | Ang.         |
| PLAT432_ALERT_2_G | Short Inter X...Y Contact C6 ..C30               |           | 2.52    | Ang.         |
| PLAT432_ALERT_2_G | Short Inter X...Y Contact C6 ..C30A              |           | 2.65    | Ang.         |
| PLAT432_ALERT_2_G | Short Inter X...Y Contact C6 ..C33               |           | 3.09    | Ang.         |
| PLAT432_ALERT_2_G | Short Inter X...Y Contact C8 ..C33               |           | 3.04    | Ang.         |
| PLAT432_ALERT_2_G | Short Inter X...Y Contact C19 ..C32A             |           | 2.47    | Ang.         |
| PLAT432_ALERT_2_G | Short Inter X...Y Contact C19 ..C32              |           | 2.54    | Ang.         |

|                   |                                                  |            |      |        |
|-------------------|--------------------------------------------------|------------|------|--------|
| PLAT432_ALERT_2_G | Short Inter X...Y Contact                        | C32 ..C33  | 2.49 | Ang.   |
| PLAT432_ALERT_2_G | Short Inter X...Y Contact                        | C33 ..C32A | 2.40 | Ang.   |
| PLAT720_ALERT_4_G | Number of Unusual/Non-Standard Labels            | .....      | 42   | Note   |
| PLAT790_ALERT_4_G | Centre of Gravity not Within Unit Cell: Resd.    | #          | 3    | Note   |
|                   | C2 H5                                            |            |      |        |
| PLAT811_ALERT_5_G | No ADDSYM Analysis: Too Many Excluded Atoms      | ....       |      | ! Info |
| PLAT860_ALERT_3_G | Number of Least-Squares Restraints               | .....      | 46   | Note   |
| PLAT909_ALERT_3_G | Percentage of I>2sig(I) Data at Theta(Max)       | Still      | 92%  | Note   |
| PLAT933_ALERT_2_G | Number of OMIT Records in Embedded .res File     | ...        | 11   | Note   |
| PLAT978_ALERT_2_G | Number C-C Bonds with Positive Residual Density. |            | 1    | Info   |

---

0 **ALERT level A** = Most likely a serious problem - resolve or explain  
 2 **ALERT level B** = A potentially serious problem, consider carefully  
 34 **ALERT level C** = Check. Ensure it is not caused by an omission or oversight  
 65 **ALERT level G** = General information/check it is not something unexpected

14 ALERT type 1 CIF construction/syntax error, inconsistent or missing data  
 39 ALERT type 2 Indicator that the structure model may be wrong or deficient  
 10 ALERT type 3 Indicator that the structure quality may be low  
 37 ALERT type 4 Improvement, methodology, query or suggestion  
 1 ALERT type 5 Informative message, check

---

It is advisable to attempt to resolve as many as possible of the alerts in all categories. Often the minor alerts point to easily fixed oversights, errors and omissions in your CIF or refinement strategy, so attention to these fine details can be worthwhile. In order to resolve some of the more serious problems it may be necessary to carry out additional measurements or structure refinements. However, the purpose of your study may justify the reported deviations and the more serious of these should normally be commented upon in the discussion or experimental section of a paper or in the "special\_details" fields of the CIF. checkCIF was carefully designed to identify outliers and unusual parameters, but every test has its limitations and alerts that are not important in a particular case may appear. Conversely, the absence of alerts does not guarantee there are no aspects of the results needing attention. It is up to the individual to critically assess their own results and, if necessary, seek expert advice.

### Publication of your CIF in IUCr journals

A basic structural check has been run on your CIF. These basic checks will be run on all CIFs submitted for publication in IUCr journals (*Acta Crystallographica*, *Journal of Applied Crystallography*, *Journal of Synchrotron Radiation*); however, if you intend to submit to *Acta Crystallographica Section C* or *E* or *IUCrData*, you should make sure that full publication checks are run on the final version of your CIF prior to submission.

### Publication of your CIF in other journals

Please refer to the *Notes for Authors* of the relevant journal for any special instructions relating to CIF submission.

---

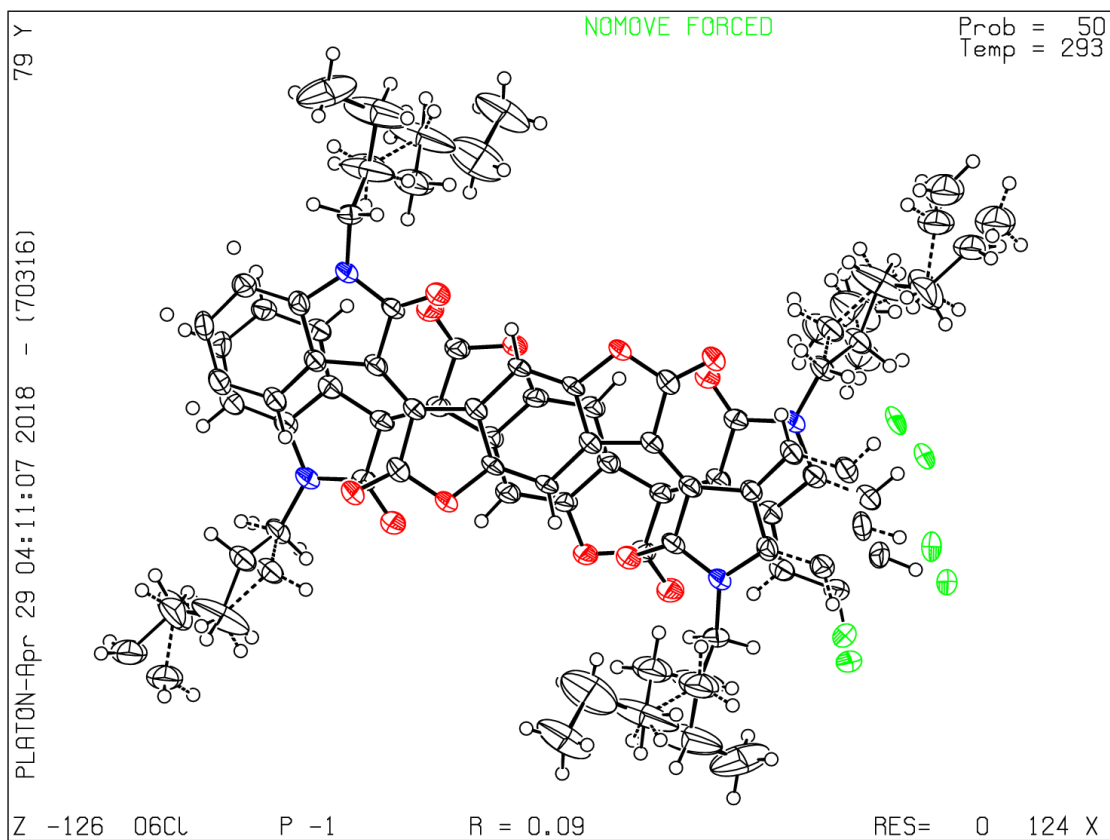

Supplement: Supplementary file 4 [file 14570123]
