# Supplementary material
Source: publisher figshare collection journal article supplement (https://acs.figshare.com/ndownloader/files/14570123)

# checkCIF/PLATON report

Structure factors have been supplied for datablock(s) 3F-decomposition

THIS REPORT IS FOR GUIDANCE ONLY. IF USED AS PART OF A REVIEW PROCEDURE FOR PUBLICATION, IT SHOULD NOT REPLACE THE EXPERTISE OF AN EXPERIENCED CRYSTALLOGRAPHIC REFEREE.

No syntax errors found.      CIF dictionary      Interpreting this report

## Datablock: 3F-decomposition

---

|                 |                        |                        |             |
|-----------------|------------------------|------------------------|-------------|
| Bond precision: | C-C = 0.0044 A         | Wavelength=1.54178     |             |
| Cell:           | a=37.4781(16)          | b=37.4781(16)          | c=6.4871(3) |
|                 | alpha=90               | beta=90                | gamma=120   |
| Temperature:    | 180 K                  |                        |             |
|                 | Calculated             | Reported               |             |
| Volume          | 7891.1(9)              | 7891.1(8)              |             |
| Space group     | R -3                   | R -3                   |             |
| Hall group      | -R 3                   | -R 3                   |             |
| Moiety formula  | C42 H41.48 F0.52 N2 O6 | C42 H41.48 F0.52 N2 O6 |             |
| Sum formula     | C42 H41.48 F0.52 N2 O6 | C42 H41.48 F0.52 N2 O6 |             |
| Mr              | 680.06                 | 680.07                 |             |
| Dx,g cm-3       | 1.288                  | 1.288                  |             |
| Z               | 9                      | 9                      |             |
| Mu (mm-1)       | 0.711                  | 0.711                  |             |
| F000            | 3241.2                 | 3241.0                 |             |
| F000'           | 3251.10                |                        |             |
| h,k,lmax        | 46,46,8                | 46,45,8                |             |
| Nref            | 3562                   | 3478                   |             |
| Tmin,Tmax       | 0.918,0.931            | 0.836,1.000            |             |
| Tmin'           | 0.899                  |                        |             |

Correction method= # Reported T Limits: Tmin=0.836 Tmax=1.000  
AbsCorr = MULTI-SCAN

Data completeness= 0.976      Theta(max)= 74.018

R(reflections)= 0.0819( 2442)      wR2(reflections)= 0.2761( 3478)

S = 1.032      Npar= 255

---

The following ALERTS were generated. Each ALERT has the format  
**test-name\_ALERT\_alert-type\_alert-level.**  
Click on the hyperlinks for more details of the test.

---

### ● Alert level C

|                   |                                                  |              |
|-------------------|--------------------------------------------------|--------------|
| PLAT077_ALERT_4_C | Unitcell Contains Non-integer Number of Atoms .. | Please Check |
| PLAT084_ALERT_3_C | High wR2 Value (i.e. > 0.25) .....               | 0.28 Report  |
| PLAT220_ALERT_2_C | Non-Solvent Resd 1 C Ueq(max)/Ueq(min) Range     | 4.7 Ratio    |
| PLAT222_ALERT_3_C | Non-Solv. Resd 1 H Uiso(max)/Uiso(min) Range     | 5.5 Ratio    |
| PLAT234_ALERT_4_C | Large Hirshfeld Difference C15 --C18             | 0.18 Ang.    |
| PLAT340_ALERT_3_C | Low Bond Precision on C-C Bonds .....            | 0.0044 Ang.  |
| PLAT906_ALERT_3_C | Large K Value in the Analysis of Variance .....  | 5.057 Check  |
| PLAT911_ALERT_3_C | Missing FCF Refl Between Thmin & STh/L= 0.600    | 5 Report     |
| PLAT918_ALERT_3_C | Reflection(s) with I(obs) much Smaller I(calc) . | 1 Check      |

---

### ● Alert level G

CELLZ01\_ALERT\_1\_G Difference between formula and atom\_site contents detected.  
CELLZ01\_ALERT\_1\_G ALERT: check formula stoichiometry or atom site occupancies.  
From the CIF: \_cell\_formula\_units\_Z 9  
From the CIF: \_chemical\_formula\_sum C42 H41.48 F0.52 N2 O6  
TEST: Compare cell contents of formula and atom\_site data

| atom | Z*formula | cif sites | diff  |
|------|-----------|-----------|-------|
| C    | 378.00    | 378.00    | 0.00  |
| H    | 373.32    | 373.36    | -0.04 |
| F    | 4.68      | 4.64      | 0.04  |
| N    | 18.00     | 18.00     | 0.00  |
| O    | 54.00     | 54.00     | 0.00  |

|                   |                                                  |              |
|-------------------|--------------------------------------------------|--------------|
| PLAT002_ALERT_2_G | Number of Distance or Angle Restraints on AtSite | 16 Note      |
| PLAT068_ALERT_1_G | Reported F000 Differs from Calcd (or Missing)... | Please Check |
| PLAT072_ALERT_2_G | SHELXL First Parameter in WGHT Unusually Large   | 0.17 Report  |
| PLAT083_ALERT_2_G | SHELXL Second Parameter in WGHT Unusually Large  | 8.42 Why ?   |
| PLAT171_ALERT_4_G | The CIF-Embedded .res File Contains EADP Records | 10 Report    |
| PLAT172_ALERT_4_G | The CIF-Embedded .res File Contains DFIX Records | 3 Report     |
| PLAT301_ALERT_3_G | Main Residue Disorder .....(Resd 1 )             | 44% Note     |
| PLAT398_ALERT_2_G | Deviating C-O-C Angle From 120 for O1            | 107.9 Degree |
| PLAT432_ALERT_2_G | Short Inter X...Y Contact F3 ..C6                | 2.82 Ang.    |
| PLAT432_ALERT_2_G | Short Inter X...Y Contact F3 ..C5                | 2.96 Ang.    |
| PLAT793_ALERT_4_G | Model has Chirality at C15 (Centro SPGR)         | S Verify     |
| PLAT793_ALERT_4_G | Model has Chirality at C15' (Centro SPGR)        | R Verify     |
| PLAT811_ALERT_5_G | No ADDSYM Analysis: Too Many Excluded Atoms .... | ! Info       |
| PLAT860_ALERT_3_G | Number of Least-Squares Restraints .....         | 14 Note      |
| PLAT910_ALERT_3_G | Missing # of FCF Reflection(s) Below Theta(Min). | 1 Note       |
| PLAT912_ALERT_4_G | Missing # of FCF Reflections Above STh/L= 0.600  | 77 Note      |
| PLAT978_ALERT_2_G | Number C-C Bonds with Positive Residual Density. | 2 Info       |

---

- 0 **ALERT level A** = Most likely a serious problem - resolve or explain  
0 **ALERT level B** = A potentially serious problem, consider carefully  
9 **ALERT level C** = Check. Ensure it is not caused by an omission or oversight  
19 **ALERT level G** = General information/check it is not something unexpected

- 3 ALERT type 1 CIF construction/syntax error, inconsistent or missing data  
8 ALERT type 2 Indicator that the structure model may be wrong or deficient  
9 ALERT type 3 Indicator that the structure quality may be low  
7 ALERT type 4 Improvement, methodology, query or suggestion  
1 ALERT type 5 Informative message, check
- 
-

It is advisable to attempt to resolve as many as possible of the alerts in all categories. Often the minor alerts point to easily fixed oversights, errors and omissions in your CIF or refinement strategy, so attention to these fine details can be worthwhile. In order to resolve some of the more serious problems it may be necessary to carry out additional measurements or structure refinements. However, the purpose of your study may justify the reported deviations and the more serious of these should normally be commented upon in the discussion or experimental section of a paper or in the "special\_details" fields of the CIF. checkCIF was carefully designed to identify outliers and unusual parameters, but every test has its limitations and alerts that are not important in a particular case may appear. Conversely, the absence of alerts does not guarantee there are no aspects of the results needing attention. It is up to the individual to critically assess their own results and, if necessary, seek expert advice.

### **Publication of your CIF in IUCr journals**

A basic structural check has been run on your CIF. These basic checks will be run on all CIFs submitted for publication in IUCr journals (*Acta Crystallographica*, *Journal of Applied Crystallography*, *Journal of Synchrotron Radiation*); however, if you intend to submit to *Acta Crystallographica Section C* or *E* or *IUCrData*, you should make sure that full publication checks are run on the final version of your CIF prior to submission.

### **Publication of your CIF in other journals**

Please refer to the *Notes for Authors* of the relevant journal for any special instructions relating to CIF submission.

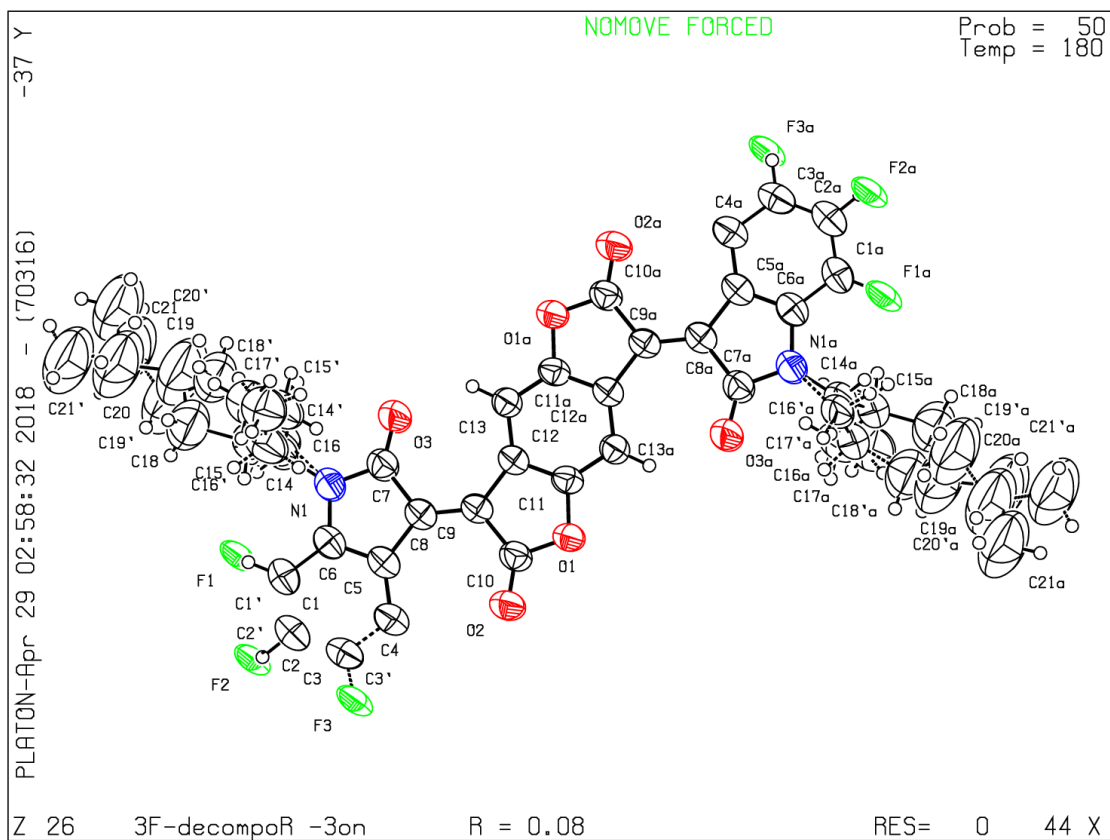

Supplement: Supplementary file 6 [file 14570123]
