# Supplementary material
Source: publisher figshare collection journal article supplement (https://acs.figshare.com/ndownloader/files/14570123)

# checkCIF/PLATON report

Structure factors have been supplied for datablock(s) 6cl

THIS REPORT IS FOR GUIDANCE ONLY. IF USED AS PART OF A REVIEW PROCEDURE FOR PUBLICATION, IT SHOULD NOT REPLACE THE EXPERTISE OF AN EXPERIENCED CRYSTALLOGRAPHIC REFEREE.

No syntax errors found.      CIF dictionary      Interpreting this report

## Datablock: 6cl

---

|                 |                   |                                     |
|-----------------|-------------------|-------------------------------------|
| Bond precision: | C-C = 0.0064 A    | Wavelength=1.54178                  |
| Cell:           | a=7.4787(6)       | b=12.4743(8)      c=21.0321(14)     |
|                 | alpha=83.940(6)   | beta=82.931(6)      gamma=82.882(6) |
| Temperature:    | 113 K             |                                     |
|                 | Calculated        | Reported                            |
| Volume          | 1924.1(2)         | 1924.1(2)                           |
| Space group     | P -1              | P -1                                |
| Hall group      | -P 1              | -P 1                                |
| Moiety formula  | C42 H38 Cl6 N2 O6 | 2(C21 H19 Cl3 N O3)                 |
| Sum formula     | C42 H38 Cl6 N2 O6 | C42 H38 Cl6 N2 O6                   |
| Mr              | 879.44            | 879.44                              |
| Dx,g cm-3       | 1.518             | 1.518                               |
| Z               | 2                 | 2                                   |
| Mu (mm-1)       | 4.512             | 4.512                               |
| F000            | 908.0             | 908.0                               |
| F000'           | 914.56            |                                     |
| h,k,lmax        | 8,14,24           | 8,14,23                             |
| Nref            | 6157              | 5943                                |
| Tmin,Tmax       | 0.759,0.914       | 0.903,1.000                         |
| Tmin'           | 0.100             |                                     |

Correction method= # Reported T Limits: Tmin=0.903 Tmax=1.000  
AbsCorr = MULTI-SCAN

Data completeness= 0.965      Theta(max)= 62.562

R(reflections)= 0.0793( 4376)      wR2(reflections)= 0.2132( 5943)

S = 1.081      Npar= 483

---

The following ALERTS were generated. Each ALERT has the format  
**test-name\_ALERT\_alert-type\_alert-level.**  
Click on the hyperlinks for more details of the test.

---

## 🟡 Alert level B

PLAT936\_ALERT\_2\_B The Embedded .res File Includes a DAMP Command . 500.0 Report

---

## 🟢 Alert level C

THETM01\_ALERT\_3\_C The value of  $\sin(\theta_{\max})/\lambda$  is less than 0.590  
Calculated  $\sin(\theta_{\max})/\lambda = 0.5756$   
PLAT018\_ALERT\_1\_C \_diffn\_measured\_fraction\_theta\_max .NE. \*\_full ! Check  
PLAT340\_ALERT\_3\_C Low Bond Precision on C-C Bonds ..... 0.00639 Ang.  
PLAT906\_ALERT\_3\_C Large K Value in the Analysis of Variance ..... 7.004 Check  
PLAT906\_ALERT\_3\_C Large K Value in the Analysis of Variance ..... 2.107 Check  
PLAT911\_ALERT\_3\_C Missing FCF Refl Between Thmin & STh/L= 0.576 206 Report  
PLAT934\_ALERT\_3\_C Number of (Iobs-Icalc)/SigmaW > 10 Outliers .... 1 Check

---

## 🟠 Alert level G

PLAT002\_ALERT\_2\_G Number of Distance or Angle Restraints on AtSite 32 Note  
PLAT003\_ALERT\_2\_G Number of Uiso or Uij Restrained non-H Atoms ... 58 Report  
PLAT042\_ALERT\_1\_G Calc. and Reported MoietyFormula Strings Differ Please Check  
PLAT083\_ALERT\_2\_G SHELXL Second Parameter in WGHT Unusually Large 5.45 Why ?  
PLAT154\_ALERT\_1\_G The s.u.'s on the Cell Angles are Equal ..(Note) 0.006 Degree  
PLAT171\_ALERT\_4\_G The CIF-Embedded .res File Contains EADP Records 4 Report  
PLAT172\_ALERT\_4\_G The CIF-Embedded .res File Contains DFIX Records 6 Report  
PLAT177\_ALERT\_4\_G The CIF-Embedded .res File Contains DELU Records 1 Report  
PLAT230\_ALERT\_2\_G Hirshfeld Test Diff for N1 --C14 6.7 s.u.  
PLAT301\_ALERT\_3\_G Main Residue Disorder .....(Resd 1 ) 29% Note  
PLAT301\_ALERT\_3\_G Main Residue Disorder .....(Resd 2 ) 29% Note  
PLAT398\_ALERT\_2\_G Deviating C-O-C Angle From 120 for O3 108.2 Degree  
PLAT398\_ALERT\_2\_G Deviating C-O-C Angle From 120 for O5 108.8 Degree  
PLAT793\_ALERT\_4\_G Model has Chirality at C15 (Centro SPGR) S Verify  
PLAT793\_ALERT\_4\_G Model has Chirality at C36 (Centro SPGR) S Verify  
PLAT793\_ALERT\_4\_G Model has Chirality at C15' (Centro SPGR) R Verify  
PLAT793\_ALERT\_4\_G Model has Chirality at C36' (Centro SPGR) R Verify  
PLAT811\_ALERT\_5\_G No ADDSYM Analysis: Too Many Excluded Atoms .... ! Info  
PLAT860\_ALERT\_3\_G Number of Least-Squares Restraints ..... 136 Note  
PLAT909\_ALERT\_3\_G Percentage of I>2sig(I) Data at Theta(Max) Still 60% Note  
PLAT910\_ALERT\_3\_G Missing # of FCF Reflection(s) Below Theta(Min). 1 Note  
PLAT978\_ALERT\_2\_G Number C-C Bonds with Positive Residual Density. 3 Info

---

0 **ALERT level A** = Most likely a serious problem - resolve or explain  
1 **ALERT level B** = A potentially serious problem, consider carefully  
7 **ALERT level C** = Check. Ensure it is not caused by an omission or oversight  
22 **ALERT level G** = General information/check it is not something unexpected

3 ALERT type 1 CIF construction/syntax error, inconsistent or missing data  
8 ALERT type 2 Indicator that the structure model may be wrong or deficient  
11 ALERT type 3 Indicator that the structure quality may be low  
7 ALERT type 4 Improvement, methodology, query or suggestion  
1 ALERT type 5 Informative message, check

---

---

It is advisable to attempt to resolve as many as possible of the alerts in all categories. Often the minor alerts point to easily fixed oversights, errors and omissions in your CIF or refinement strategy, so attention to these fine details can be worthwhile. In order to resolve some of the more serious problems it may be necessary to carry out additional measurements or structure refinements. However, the purpose of your study may justify the reported deviations and the more serious of these should normally be commented upon in the discussion or experimental section of a paper or in the "special\_details" fields of the CIF. checkCIF was carefully designed to identify outliers and unusual parameters, but every test has its limitations and alerts that are not important in a particular case may appear. Conversely, the absence of alerts does not guarantee there are no aspects of the results needing attention. It is up to the individual to critically assess their own results and, if necessary, seek expert advice.

### **Publication of your CIF in IUCr journals**

A basic structural check has been run on your CIF. These basic checks will be run on all CIFs submitted for publication in IUCr journals (*Acta Crystallographica*, *Journal of Applied Crystallography*, *Journal of Synchrotron Radiation*); however, if you intend to submit to *Acta Crystallographica Section C* or *E* or *IUCrData*, you should make sure that full publication checks are run on the final version of your CIF prior to submission.

### **Publication of your CIF in other journals**

Please refer to the *Notes for Authors* of the relevant journal for any special instructions relating to CIF submission.

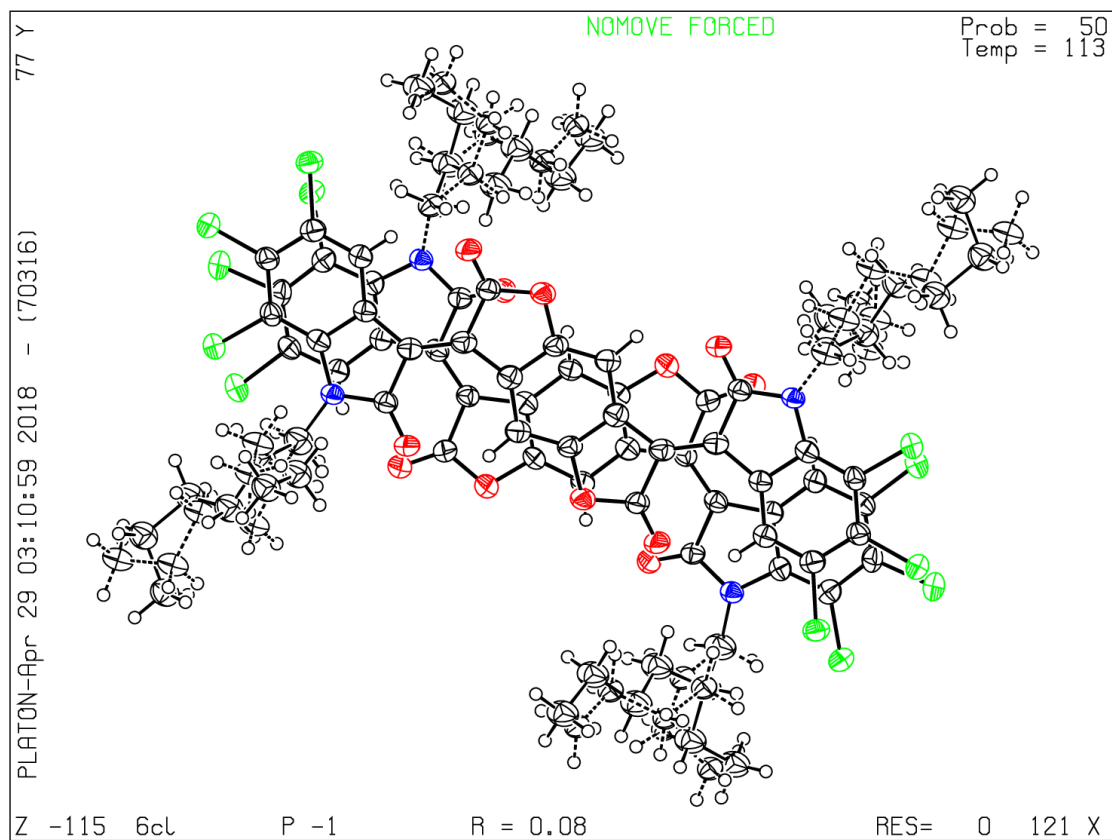

Supplement: Supplementary file 7 [file 14570123]
